# Supplementary material for: Breast Cancer Risk Factors and Survival by Tumor Subtype: Pooled Analyses from the Breast Cancer Association Consortium
Source: Oxford University Press journal article supplement (doi:10.1158/1055-9965.epi-20-0924), 2021-01-26
Supplement: 10559965epi200924-sup-245316_4_supp_6780392_ql6hjw.xlsx [file 10559965epi200924-sup-245316_4_supp_6780392_ql6hjw.xlsx]

## Sheet: Supplementary Table S1
Supplementary Table S1: Overview of the Breast Cancer Association Consortium (BCAC) studies.
Study	Abbreviation	Country	Study design	Case definition	Included	Reason for exclusion	Total Cases*,#	Age (cases) range*,#			Ethnicity*	References
The Two Sister Study	2SISTER	USA	Case-only study of prevalent young-onset breast cancer cases identified through SISTER	Women diagnosed with young-onset (<50 years) breast cancer within 4 yrs of enrolment and who have a sister participating in SISTER. Recruitment from Sep 2008 to Dec 2010.	No	No samples left after applying exclusion criteria for individual subjects						Fei, C., et al. "Fertility drugs and young-onset breast cancer: results from the Two Sister Study." J Natl Cancer Inst. 104.13 (2012): 1021-27.
Australian Breast Cancer Family Study	ABCFS	Australia	Population-based case-control study	All cases diagnosed < age 40 plus a random sample of those diagnosed ages 40-59 from cancer registries in Victoria and New South Wales, plus a limited number diagnosed aged 60-69; cases living in Melbourne recruited from 1992-99 and in Sydney from 1993-98.	Yes		1677	23	-	88	European	Dite, G.S. et al. Familial risks, early-onset breast cancer, and BRCA1 and BRCA2 germline mutations. J. Natl. Cancer Inst., 95, 448-57 (2003).
Amsterdam Breast Cancer Study	ABCS	Netherlands	Hospital-based consecutive cases; population-based controls (for iCOGS/OncoArray from blood bank).	Pre-iCOGS: All breast cancer patients (with operable, invasive mammacarcinoma) aged <50 years and diagnosed from 1970-1994 in four Dutch hospitals. iCOGS/OncoArray: Breast cancer patients diagnosed before age 50 in 1995-2011 at the Netherlands Cancer Insitute - Antoni van Leeuwenhoek hospital (NKI-AVL).	Yes		4542	19	-	49	European	Schmidt MK et al. Breast Cancer Survival and Tumor Characteristics in Premenopausal Women Carrying the CHEK2*1100delC Germline Mutation, J.Clin.Oncol. 25, 64-9 (2007). Schmidt MK et al. Breast Cancer Survival of BRCA1/BRCA2 Mutation Carriers in a Hospital-Based Cohort of Young Women. J Natl Cancer Inst. 2017 Aug 1;109(8).
Amsterdam Breast Cancer Study - Familial	ABCS-F	Netherlands	Clinical Genetic Center-based cases	Pre-iCOGS: Only in BCAC PhaseI/II familial non-BRCA1/2 cases <50 from the Clinical Genetic Centre of the Netherlands Cancer Institute were included. iCOGS/OncoArray: All non-BRCA1/2 breast cancer cases from the family cancer clinic of the NKI-AVL tested in the period 1995-2009; all ages and diagnosed with breast cancer in 1965-2012.	No	Oversampling of familial cases						K. Michailidou, et al. Large-scale genotyping identifies 41 new loci associated with breast cancer risk, Nat Genet. 45, 353-61 (2013).
Australian Breast Cancer Tissue Bank	ABCTB	Australia	Hospital-based multi site newly diagnosed breast cancer case	Newly diagnosed unselected cases from 32 hospitals in New South Wales from 2006	Yes		1273	26	-	97	Multiple	McEvoy M, et al. Cohort profile: The Hunter Community Study. Int J Epidemiol. 2010 Dec;39(6):1452-63.
Asia Cancer Program	ACP	Thailand	Hospital-based case-control study	Cases recruited 1999-2000 and 2008-present at The National Cancer Institute (Central region), The Prince Songkla University Research Centre (South region), The HRH Princess Maha Chakri Sirindhorn Medical Centre (MSMC)-Srinakarinviroj University (Eastern region), Khon-Kaen University Cancer Centre (North-eastern region). 1. Women who underwent biopsy and have been pathologically diagnosed as havin…	No	No samples left after applying exclusion criteria for individual subjects						No refs yet; manuscript in preparation
Agricultural Health Study	AHS	USA	Prospective cohort study: nested case-control	This is a nested case-control study conducted within a cohort of pesticide (57,310) applicators and their spouses (n=32, 345) who enrolled during 1993-1997 in Iowa and North Carolina. Cases are white females with incident breast cancer diagnosed between 1993 and 2012 in North Carolina and 2013 in Iowa with no previous history of any cancer.	Yes		565	31	-	89	European	Koutros et al. An update of cancer incidence in the Agricultural Health Study. J Occup Environ Med. 2010. Lerro et al. Organophosphate insecticide use and cancer incidence among spouses of pesticide applicators in the Agricultural Health Study. Occup Environ Med. 2015
Bavarian Breast Cancer Cases and Controls	BBCC	Germany	Hospital-based cases; population based controls	Consecutive, unselected cases with invasive breast cancer recruited at the University Breast Centre, Franconia in Northern Bavaria during 1999-2013.	Yes		2893	19	-	95	European	Fasching PA, et al. Single nucleotide polymorphisms of the aromatase gene (CYP19A1), HER2/neu status, and prognosis in breast cancer patients. Breast Cancer Res Treat. DOI 10.1007/s10549-007-9822-2 (2007). Schrauder M, et al. Single nucleotide polymorphism D1853N of the ATM gene may alter the risk for breast cancer. J. Cancer Res. Clin. Oncol.,134, 873-82 (2008).
British Breast Cancer Study	BBCS	UK	Cancer registry and National Cancer Research network (NCRN) based cases; population-based controls	1) English & Scottish Cancer Registries: all breast cancer cases who developed a first primary before age 65 in 1971 or later and who subsequently developed a second primary cancer. 2) Unilateral breast cancer cases diagnosed before age 70 in 1971 or later.	No	Oversampling of bilateral cases						Johnson, N. et al. Interaction between CHEK2*1100delC and other low-penetrance breast-cancer susceptibility genes: a familial study. Lancet, 366, 1554-7 (2005). Fletcher, O. et al. Inconsistent association between the STK15 F31I genetic polymorphism and breast cancer risk. J. Natl. Cancer. Inst., 98, 1014-8 (2006).
Breast Cancer Employment and Environment Study	BCEES	Australia	Population-based case-control study	First incident invasive breast cancer diagnosed between May 2009 and January 2011, residing in Western Australia and reported to the state wide mandatory Cancer Registry.	Yes		834	27	-	80	European	Fritschi L, Erren TC, Glass DC, Girschik J, Thomson AK, Saunders C, et al. The association between different night shiftwork factors and breast cancer: a case-control study. Br J Cancer. 2013;109:2472-80.
New York Breast Cancer Family Registry	BCFR-NY	USA	Clinic-based recruitment of families; family-based cohort	Recruitment took place from Jan 1996 to Dec 2012. Eligibility was based on one or more of the following criteria: two or more relatives with a personal history of breast or ovarian cancer; a woman diagnosed with breast or ovarian cancer at a young age; a woman with a history of both breast and ovarian cancer; an affected male; or known BRCA1 or BRCA2 mutation carriers.	No	Oversampling of familial cases						John, EM et al. The Breast Cancer Family Registry: an infrastructure for cooperative multinational, interdisciplinary and translational studies of the genetic epidemiology of breast cancer. Breast Cancer Res 6, R375-R389 (2004). Wu, HC et al. Repetitive element DNA methylation levels in white blood cell DNA from sisters discordant for breast cancer from the New York site of the Breast Cancer Fami…
Philadelphia Breast Cancer Family Registry	BCFR-PA	USA	Clinic-based recruitment of families; family-based cohort	Recruitment took place from 1996 to 2011. Eligibility was based on one or more of the following criteria: 2 or more relatives with a personal history of breast or ovarian cancer; a woman diagnosed with breast or ovarian cancer at a young age; a woman with a history of both breast and ovarian cancer; an affected male; or known BRCA1 or BRCA1 mutation carriers.	No	Oversampling of familial cases						John, EM et al. The Breast Cancer Family Registry: an infrastructure for cooperative multinational, interdisciplinary and translational studies of the genetic epidemiology of breast cancer. Breast Cancer Res 6, R375-R389 (2004) . Terry M, Phillips K, Daly M, et al. Cohort Profile: The Breast Cancer Prospective Family Study Cohort (ProF-SC). International Journal of Epidemiology 2015;:dyv118.
Utah Breast Cancer Family Registry	BCFR-UT	USA	Clinic-based recruitment of non-BRCA1/2 familial breast cancer cases;unaffected BRCA1/2 carriers as controls	Index cases from families tested negative for BRCA1/2 mutations. Recruited in Utah during 1995-2008.	No	Oversampling of familial cases						John, EM et al. The Breast Cancer Family Registry: an infrastructure for cooperative multinational, interdisciplinary and translational studies of the genetic epidemiology of breast cancer. Breast Cancer Res 6, R375-R389 (2004). Terry M, Phillips K, Daly M, et al. Cohort Profile: The Breast Cancer Prospective Family Study Cohort (ProF-SC). International Journal of Epidemiology 2015;:dyv118.
Breast Cancer in Northern Israel Study	BCINIS	Israel	Population-based case-control study	All consecutive cases of invasive BC and DCIS diagnosed in a geographically defined area of Northern Israel since 1990. On-going.	Yes		1524	24	-	99	European, Jews and Arabs	Rennert G, Pinchev M, Rennert HS. Use of Bisphosphonates and Risk of Postmenopausal Breast Cancer. J Clin Oncol 2010 Aug 1;28(22):3577-81. Rennert G, Lejbkowicz F, Cohen I, Pinchev M, Rennert HS, Barnett-Griness O. MutYH mutation carriers have increased breast cancer risk. Cancer. 2011 Sep 22. doi: 10.1002/cncr.26506. [Epub ahead of print].
Breast Cancer in Galway Genetic Study	BIGGS	Ireland	Hospital-based cases; population based controls	Unselected cases recruited from West of Ireland since 2001. Cases were recruited from University College Hospital Galway and surrounding hospitals.	Yes		496	27	-	89	European	Colleran G, McInerney N, Rowan A, Barclay E, Jones AM, Curran C, Miller N, Kerin M, Tomlinson I, Sawyer E. The TGFBR1*6A/9A polymorphism is not associated with differential risk of breast cancer. Breast Cancer Res Treat. 2009 Apr 24. Niall Mcinerney, Gabrielle Colleran, Andrew Rowan, Axel Walther, Ella Barclay, Sarah Spain Angela M. Jones Stephen Tuohy, Catherine Curran, Nicola Miller, Michael Ke…
ICR Familial Breast and Ovarian Cancer Study	BOCS	UK	Clinic-based recruitment of familial breast cancer patients; population-based controls	Index patients with breast cancer and at least 2 relatives affected with breast cancer. All White individuals collected in 1995-2005 throughout UK	No	Oversampling of familial cases						Seal et al. Truncating mutations in BRIP1 are low penetrance breast cancer susceptibility alleles. Nature Genetics 38:1239-41 (2006). Rahman et al PALB2 which encodes a BRCA2 interacting protein, is a breast cancer susceptibilty gene. Nature Genetics 39:162-4 (2007).
Breast Oncology Galicia Network	BREOGAN	Spain	Population-based case-control	A population-based study conducted since 1997 in two cities in Galicia, Spain (Vigo and Santiago) covering approximately 700,000 inhabitants. The study currently includes over 1600 incident breast cancer cases diagnosed from 1997-2014 in two Galician hospitals with blood, tumor tissue and risk factor questionnaire.	Yes		1889	25	-	94	European (Spain)	Castelao JE, Jiang XJ, Chavez-Uribe E, Fernandez Rodriguez B, Celeiro Muñoz C, Redondo Marey C, Peña Fernandez M, Novo Dominguez A, Dono Perez A, Doris Pereira C, Tomé MA, GarcÍa-Caballero T, Martínez ME, Fraga Rodriguez M, Carracedo A, Forteza-Vila J, Gago-Dominguez M. Family History and Breast Cancer Subtypes in a Spanish Cohort PLoS One. 2012;7:e29459. Redondo, C. M., M. Gago-Dominguez, et al.…
Breast Cancer Study of the University of Heidelberg	BSUCH	Germany	Hospital-based cases;healthy blood donator controls	Cases diagnosed with breast cancer/breast cancer metastasis in 2008-2011 at the University Women`s Clinic Heidelberg.	Yes		1016	23	-	88	European	Yang,R. et al. Genetic variants within miR-126 and miR-335 are not associated with breast cancer risk. Breast Cancer Res Treat 127, 549-554 (2011).
CAMA-Mexican Breast Cancer Study	CAMA	Mexico	Population-based case-control study	All participants were pre- or postmenopausal women, between 35 and 69 years of age, living at one of the study sites Mexico City, Veracruz and Monterrey, for the past 5 years, with a new histologically confirmed diagnosis of breast cancer, regardless of the stage of disease; with no previous treatment such as radiotherapy, chemotherapy or antiestrogens such as tamoxifen during the previous 6 mont…	No	No samples left after applying exclusion criteria for individual subjects						Angélica Ángeles-Llerenas, Carolina Ortega-Olvera, Edelmiro Pérez-Rodríguez, Jesús Pablo Esparza-Cano, Eduardo Lazcano-Ponce Isabelle Romieu, Gabriela Torres-Mejía. Moderate physical activity and breast cancer risk: the effect of menopausal status. Cancer Causes Control. 2010 Apr;21(4):577-86.13. Fejerman L, Romieu I, John EM, Lazcano-Ponce E, Huntsman S, Beckman KB, Pérez-Stable EJ, González Bur…
Canadian Breast Cancer Study	CBCS	Canada	Population-based case-control study	British Columbia (BC)- Incident cases diagnosed 2005-2009, resident in Vancouver area ascertained from the population cancer registry. Ontario - recruited from the Hotel Dieu Breast Assessment Program in Kingston, Ontario, 2005-2009.	No	No samples left after applying exclusion criteria for individual subjects						Grundy A, Schuetz JM, Lai AS, Janoo-Gilani R, Leach S, Burstyn I, Richardson H, Brooks-Wilson A, Spinelli JJ, Aronson KJ. Shift work, circadian gene variants and risk of breast cancer. Cancer Epidemiol. 2013 Oct;37(5):606-12. doi: 10.1016/j.canep.2013.04.006. Epub 2013 May 28. PMID: 23725643. Kobayashi LC, Janssen I, Richardson H, Lai AS, Spinelli JJ, Aronson KJ. Moderate-to-vigorous intensity ph…
Crete Cancer Genetics Program	CCGP	Greece	Hospital-based case-control study	Incident breast cancer cases treated between 2004 and 2013 at the University Hospital of Heraklion on Crete; all enrolled within 6 months of diagnosis.	Yes		653	25	-	84	European	No references yet
CECILE Breast Cancer Study	CECILE	France	Population-based case-control study	All incident cases of breast cancer diagnosed in 2005-2007 among women <75 years of age and residing in Ille-et-Vilaine or Côte d'Or. Cases were recruited from the main cancer treatment center (Centre Eugène-Marquis in Rennes and Centre Georges-François-Leclerc in Dijon) and from private or public hospitals in each area.	Yes		1022	25	-	74	European	Menegaux F, Truong T, Anger A, Cordina-Duverger E, Lamkarkach F, Arveux P, Kerbrat P, Fevotte J, Guenel P: Night work and breast cancer: a population-based case-control study in France (the CECILE study). Int J Cancer 2013, 132(4):924-931.
Copenhagen General Population Study	CGPS	Denmark	Population-based case-control study	Consecutive, incident cases from 1 hospital with centralized care for a population of 400,000 women from 2001 to the present.	Yes		5029	24	-	99	European	Weischer,M., Bojesen,S.E., Tybjaerg-Hansen,A., Axelsson,C.K., & Nordestgaard,B.G. Increased risk of breast cancer associated with CHEK2*1100delC. J Clin Oncol 25, 57-63 (2007).
Spanish National Cancer Centre Breast Cancer Study	CNIO-BCS	Spain	Case-control study	Two groups of cases:1) 574 consecutive breast cancer patients, unselected for family history, from 3 public hospitals, 2 in Madrid and one in Oviedo, from 2000 to 2005. 2) 291 cases with at least one first degree relative also affected with breast cancer, recruited through the CNIO family cancer clinic in Madrid from 2000 to 2004.	No	Oversampling of familial cases and no follow-up data available						Milne, RL et al. ERCC4 associated with breast cancer risk: a two stage case-control study using high throughput genotyping. Cancer Res., 66, 9420-7 (2006)
Colombian Breast Cancer Case-Control Study	COLBCCC	Colombia	Case-control study	1,022 unselected women diagnosed with breast cancer after January 1, 2004; enrolled between 2007 and 2012.	Yes		587	22	-	85	Hispanic	No references yet
Cancer Prevention Study-II Nutrition Cohort	CPS-II	USA	Prospective cohort: nested case-control study	Breast cancer cases from the CPS-II Nutrition cohort were diagnosed between 1992 and 2009. The cases self-reported their diagnoses on biennial questionnaires and the diagnoses were then validated by medical records or state cancer registries. The participants in the Nutrition cohort were a subset of participants who lived in 21 U.S. states and were in the original CPS-II Cohort. The CPS-II Cohort…	Yes		2526	46	-	89	100% self-described white	Calle EE, Rodriguez C, Jacobs EJ, et al. The American Cancer Society nutrition cohort: rationale, study design and baseline characteristics. Cancer 2002;94:2490–501.
California Teachers Study	CTS	USA	Prospective cohort study: nested case-control	This is a nested case-control study conducted within a cohort of California teachers (113,590) who were under age 80 years at baseline, had no prior history of invasive or in situ breast cancer. Cases are women newly diagnosed with a histologically confirmed invasive primary adenocarcinoma of the breast at age 80 years or younger from 1998 to 2008.	Yes		1814	31	-	82	Mixed (92.8% White, 1.5% African American, 1.5% Hispanic, 2.2% Asian, 2% Other)	Bernstein L, Allen M, Anton-Culver H, Deapen D, Horn-Ross PL, Peel D, Pinder R, Reynolds P, Sullivan-Halley J, West D et al. High breast cancer incidence rates among California teachers: results from the California Teachers Study (United States). Cancer Causes Control 2002, 13(7):625-635.
DietCompLyf Breast Cancer Survival Study	DIETCOMPLYF	UK	Multi-centre prospective cohort study (patient cohort)	Invasive primary breast cancer grade I-III, patients recruited 9 - 15 months after diagnosis, <age 75. Recruitment throughout UK. Patient first recruited on 18/2/97. Study joined NCRN in July 2004. Recruitment finished on 31/8/10	Yes		976	26	-	75	Majority UK	Swann R, Perkins KA, Velentzis LS, Ciria C, Dutton SJ, Mulligan AA, Woodside JV, Cantwell MM, Leathem AJ, Robertson CE, Dwek MV. The DietCompLyf study: A prospective cohort study of breast cancer survival and phytoestrogen consumption. Maturitas (2013) 75: 232-240.
European Prospective Investigation Into Cancer and Nutrition	EPIC	France, Germany, Greece, Italy, Spain, The Netherlands, and UK	Case-control study, nested in a prospective cohort study	Recruitment via 23 research centres in 10 European countries (Denmark, France, Germany, Greece, Italy, Norway, Spain, Sweden, The Netherlands, and UK) during the period 1992-2000. Cases are women diagnosed with invasive breast cancer after baseline.	Yes		3452	29	-	88	European	Riboli E, Hunt KJ, Slimani N, Ferrari P, Norat T, Fahey M, Charrondiere UR, Hemon B, Casagrande C, Vignat J, Overvad K, Tjonneland A et al.,European Prospective Investigation into Cancer and Nutrition (EPIC): study populations and data collection. Public Health Nutr (2002) 5:1113-1124
ESTHER Breast Cancer Study	ESTHER	Germany	Population-based case-control study	Statewide recruitment of breast cancer cases in all hospitals in Saarland/Germany in 2001-2003.	Yes		697	30	-	81	European	Widschwendter M, Apostolidou S, Raum E, Rothenbacher D, Fiegl H, Menon U, Stegmaier C, Jacobs IJ, Brenner H. Epigenotyoing in peripheral blood cell DNA and breast cancer risk: a proof of principle study. PloS ONE 2008;3:e2656.
Family History Risk Study	FHRISK	UK	Clinic-based cohort study with a nested case-control study	Women diagnosed with breast cancer and attending the Family History Clinic in Manchester for increased risk of breast cancer. Recruitment period 2009-2012.	No	Oversampling of familial cases						Evans DG, Astley S, Stavrinos P, Harkness E, Donnelly LS, Dawe S, Jacob I, Harvie M, Cuzick J, Brentnall A, Wilson M, Harrison F, Payne K, Howell A. Improvement in risk prediction, early detection and prevention of breast cancer in the NHS Breast Screening Programme and family history clinics: a dual cohort study. Southampton (UK): NIHR Journals Library; 2016 Aug. Ingham SL, Warwick J, Buchan I, …
German Consortium for Hereditary Breast & Ovarian Cancer	GC-HBOC*	Germany	Clinic-based case study and prospective cohort study	Women diagnosed with breast cancer in one of the GC-HBOC centres (Cologne, Munich, Kiel, Heidelberg, Düsseldorf, Ulm, Würzburg, Münster and Hannover). Recruitment period 1996-present.	No	Oversampling of familial cases						Kast K, et al. Prevalence of BRCA1/2 germline mutations in 21,401 families with breast and ovarian cancer. J Med Genet 2016 53(7):465-71. Rhiem K, et al. Breast Cancer Res 2012 Dec 7;14(6):R156. Graeser MK, et al. J Clin Oncol 2009 Dec 10;27(35):5887-92. Engel C, et al. BMC Cancer 2018 Mar 7;18(1):265.
Generation Scotland	GENSCOT	Scotland	Prospective family-based cohort study; nested case-control	Incident and prevalent cases of histologically-confirmed breast cancer at the time of latest updated cancer registry linkage (currently 2013). Recruitment though the General Practitioners in the areas of Glasgow, Tayside, Ayrshire, Arran and Northeast Scotland.	No	No samples left after applying exclusion criteria for individual subjects			-			BH Smith et al (2012). Cohort Profile: Generation Scotland: Scottish Family Health Study. Int J Epidemiol 42: 689-700. http://www.ncbi.nlm.nih.gov/pubmed/22786799
Gene Environment Interaction and Breast Cancer in Germany	GENICA	Germany	Population-based case-control study	Incident breast cancer cases enrolled between 2000 and 2004 from the Greater Bonn area (by hospitals within the study region); all enrolled within 6 months of diagnosis.	Yes		967	23	-	80	European	Pesch, B. et al. Factors modifying the association between hormone –replacement therapy and breast cancer risk. Eur. J. Epidemiol., 20:699-711 (2005). Justenhoven,C. et al. The CYP1B1_1358_GG genotype is associated with estrogen receptor-negative breast cancer. Breast Cancer Res Treat. 111, 171-177 (2008).
A randomized phase II trial investigating the addition of carboplatin to neoadjuvant therapy for triple-negative and HER2-positive early breast cancer	GEPARSIXTO	Germany	Multicenter, prospective, randomized, open-label phase II study	Patients with primary Her2-positive or Triple-negative breast cancer and eligible stages of disease (pT1c and pN+ oder >pT1c). Recruitment at multicentres in Germany during 2011-2012.	No	No samples left after applying exclusion criteria for individual subjects						Denkert C, et al. (2014) Expression of immunologic genes in triple-negative and HER2-positive breast cancer in the neoadjuvant GEPARSIXTO trial: Prediction of response to carboplatin-based chemotherapy. J Clin Oncol 32 (15). von Minckwitz G, et al. (2014) Neoadjuvant carboplatin in patients with triple-negative and HER2-positive early breast cancer (GeparSixto; GBG 66): a randomised phase 2 trial…
Genetic Epidemiology Study of Breast Cancer by Age 50	GESBC	Germany	Population-based study of women <50 years	All incident cases diagnosed <50 years of age in 1992-5 in two regions: Rhein-Neckar-Odenwald and Freiburg, by surveying the 38 clinics serving these regions.	Yes		622	20	-	51	European	Chang-Claude,J., Eby,N., Kiechle,M., Bastert,G., & Becher,H. Breastfeeding and breast cancer risk by age 50 among women in Germany. Cancer Causes Control 11, 687-695 (2000).
Study to Investigate the Genetics of Lobular Carcinoma In situ in Europe	GLACIER	UK	Hospital-based case-control study	Cases aged 60 or younger with LCIS (pure or associated with invasive cancer of any subtype) or invasive lobular breast cancer from 96 hospitals throughout the UK. Recruitment period was from Jun 2007 to Sep 2012.	No	No samples left after applying exclusion criteria for individual subjects						Sawyer E et al. Genetic predisposition to in situ and invasive lobular carcinoma of the breast. PLoS Genet. 2014 Apr 17;10(4)
Hannover Breast Cancer Study	HABCS	Germany	Hospital-based case-control study	Cases who received radiotherapy for breast cancer at Hannover Medical School between 1996-2003 (HaBCS I), or were diagnosed with breast cancer at a certified Breast Cancer Clinics in the Hannover region between 2012-2016 (HaBCS II), unselected for age or family history.	Yes		901	23	-	89	European	Dork, T. et al. Spectrum of ATM gene mutations in a hospital-based series of unselected breast cancer patients. Cancer Res., 61, 7608-7615 (2001).
Hospital Clinico San Carlos	HCSC	Spain	Population-based study of priori sporadic breast cancer cases	This is a cohort of a priori sporadic breast cancer patients which includes a cohort of 200 patients that were enrroled in a neoadyuvant trial in which women were randomized to neoadyuvant docetaxel vs neoadyuvant doxorrubicin. Recruitment period was from 2000 to 2013. Most patients have been treated in the Clinio San Carlos hospital (Madrid) and most and are being followed in different hospitals…	Yes		327	26	-	93	European	Romero A, García-Sáenz JA, Fuentes-Ferrer M, López Garcia-Asenjo JA, Furió V, Román JM, Moreno A, de la Hoya M, Díaz-Rubio E, Martín M, Caldés T. Correlation between response to neoadjuvant chemotherapy and survival in locally advanced breast cancer patients. Ann Oncol. 2013 Mar;24(3):655-61. Martin M, Romero A, Cheang MC, López García-Asenjo JA, García-Saenz JA, Oliva B, Román JM, He X, Casado A…
Helsinki Breast Cancer Study	HEBCS	Finland	Hospital-based case-control study, plus additional familial cases	(1) Consecutive cases (883) from the Department of Oncology, Helsinki University Central Hospital 1997-8 and 2000, (2) Consecutive cases (986) from the Department of Surgery, Helsinki University Central Hospital 2001 – 2004, (3) Familial breast cancer patients (536) from the Helsinki University Central Hospital, Departments of Oncology and Clinical Genetics (1995-).	Yes		1681	22	-	95	European	Syrjakoski, K. et al. Population-based study of BRCA1 and BRCA2 mutations in 1035 unselected Finnish breast cancer patients. J. Natl. Cancer Inst., 92, 1529-31 (2000). Kilpivaara, O. et al. Correlation of CHEK2 protein expression and c.1100delC mutation status with tumor characteristics among unselected breast cancer patients. Int J. Cancer, 113, 575-80 (2005). Fagerholm,R. et al. NAD(P)H:quinone…
Hereditair Borst-en eierstokkanker Onderzoek Nederland	HEBON	Netherlands	Clinical genetic center-based recruitment of familial breast or ovarian cancer patients (cases)	Breast (or sometimes ovarian) cancer patients who were tested for mutations in BRCA1 and BRCA2 in one of the clinical genetic centers in the Netherlands between 1996 and 2016. All counselees received an invitation to participate in the HEBON study.	No	Oversampling of familial cases
Hospital-based Epidemiologic Research Program at Aichi Cancer Center	HERPACC	Japan	Hospital-based case-control study	Incident breast cancer cases who firstly visited Aichi Cancer Center between 2001 and 2013 and were diagnosed within 1 year from the first visit. No previous history of any type of cancer.	Yes		657	23	-	79	Japanese	Kawase T et al. FGFR2 intronic polymorphisms interact with reproductive risk factors of breast cancer: results of a case control study in Japan. Int J Cancer 2009: 125:1946-1952.
Hong Kong Breast Cancer Study	HKBCS	Hong Kong	Hospital-based case-control study	Genetic screening of high risk breast cancer patients from all Hong Kong hospitals. Incidence cases clasified as high risk group: 1) first degree relative with breast and/or ovarian cancer, 2) cases where age is less than or equal to 45 years, 3) bilateral breast cancer, 4) triple negative breast cancer cases, 5) family history of breast and /or ovarian cancer. Cases were recruited 2006-2014.	No	Oversampling of familial cases						Kwong A et al. Novel BRCA1 and BRCA2 genomic rearrangements in Southern Chinese breast/ovarian cancer patients. Breast Cancer Res Treat. 2012: 136(3):931-3. Kwong A et al. Identification of BRCA1/2 founder mutations in Southern Chinese breast cancer patients using gene sequencing and high resolution DNA melting analysis. PLoS One. 2012: 7(9):e43994.
Hannover-Minsk Breast Cancer Study	HMBCS	Belarus	Hospital-based cases; population based controls	Ascertainment at the Byelorussian Institute for Oncology and Medical Radiology Aleksandrov N.N. in Minsk or at one of 5 regional oncology centers in Gomel, Mogilev, Grodno, Brest or Vitebsk through the years 2002-2008.	No	No samples left after applying exclusion criteria for individual subjects						Bogdanova,N. et al. A nonsense mutation (E1978X) in the ATM gene is associated with breast cancer. Breast Cancer Res Treat 118, 207-211 (2009).
Hannover-Ufa Breast Cancer Study	HUBCS	Russia	Hospital-based cases; population based controls	Consecutive Russian breast cancer patients aged 24-86 years ascertained at one of the two participating oncological centers in Bashkorstostan and Siberia through the years 2000-2008.	No	Did not perform regular follow-up, and very few events						Bogdanova,N. et al. A nonsense mutation (E1978X) in the ATM gene is associated with breast cancer. Breast Cancer Res Treat.(2008).
Study to Investigate the Genetics of In Situ Carcinoma of the Ductal Subtype	ICICLE	UK	Hospital-based case-control study	Cases aged 60 or younger with pure DCIS (no associated invasive cancer of any subtype) from 96 hospitals throughout the UK. Recruitment period was from Jul 2008 to Nov 2012.	Yes		2	56	-	59	Predominantly European - data on ethnicity avalible for all cases and controls	No references yet
Portuguese Oncology Institute-Porto Breast Cancer Study	IPOBCS	Portugal	Clinical genetic center-based recruitment of familial/early onset breast cancer patients (cases)	Familial and/or early onset breast cancer patients negative for pathogenic mutations in BRCA1/BRCA2, recruited at IPO-Porto between 1999 and 2005.	No	Oversampling of familial cases						Peixoto A, Santos C, Pinto P, Pinheiro M, Rocha P, Pinto C, Bizarro S, Veiga I, Principe AS, Maia S, Castro F, Couto R, Gouveia A, Teixeira MR. The role of targeted BRCA1/BRCA2 mutation analysis in hereditary breast/ovarian cancer families of Portuguese ancestry. Clin Genet. 2015 Jul;88(1):41-8. doi: 10.1111/cge.12441. Epub 2014 Jul 26. PubMed PMID: 24916970.
Karolinska Breast Cancer Study	KARBAC	Sweden	Population and hospital-based cases; geographically matched controls	1. Familial cases from Department of Clinical Genetics, Karolinska University Hospital , Stockholm. 2. Consecutive cases from Department of Oncology, Huddinge & Söder Hospital, Stockholm 1998-2000.	Yes		462	27	-	88	European	Wendt C. et al. Tumor spectrum in non-BRCA hereditary breast cancer families in Sweden. Hered Cancer Clin Pract. 2015 16;13(1):15. Margolin S. et al. BRCA1 mutations in a population –based study of breast cancer in Stockholm County. Genet. Test., 8, 127-32 (2004).
Karolinska Mammography Project for Risk Prediction of Breast Cancer - Cohort Study	KARMA	Sweden	Prospective cohort study	Inclusion of 70,877 women Oct 2010 - March 2013. 3000 women had BC at cohort entry. In all, 800 women have been diagnosed with breast cancer since study entry (Oct 2015). Approximately 250 women are diagnosed with BC annually.	Yes		2770	23	-	94	European	Submitted
Kuopio Breast Cancer Project	KBCP	Finland	Population-based prospective clinical cohort	1. Women seen at Kuopio University Hospital between 1990 and 1995 because of breast lump, mammographic abnormality, or other breast symptom who were found to have breast cancer. 2. Consecutive malignant breast cancer cases diagnosed at KUH from 2011 onwards.	Yes		451	23	-	91	European	Hartikainen, J.M. et al. An autosome-wide scan for linkage disequilibrium-based association in sporadic breast cancer cases in eastern Finland: three candidate regions found. Cancer Epidemiol. Biomarkers Prev., 14, 75-80 (2005). Hartikainen,J.M. et al. Refinement of the 22q12-q13 breast cancer-associated region: evidence of TMPRSS6 as a candidate gene in an eastern Finnish population. Clin Cancer…
Kathleen Cuningham Foundation Consortium for research into Familial Breast Cancer/Australian Ovarian Cancer Study	kConFab/AOCS	Australia and New Zealand	Clinic-based recruitment of familial breast cancer patients (cases); population-based case-control study of ovarian cancer (controls only)	Cases were from multiple-case breast and breast-ovarian families recruited though family cancer clinics from across Australia and New Zealand from 1998 to the present. Cases were selected for inclusion in BCAC studies if (i) family was negative for mutations in BRCA1 and BRCA2 (ii) case was the index for the family, defined as youngest breast cancer affected family member.	No	Oversampling of familial cases						Mann, G.J. et al. Analysis of cancer risk and BRCA1 and BRCA2 mutation prevalence in the kConFab familial breast cancer resource. Breast Cancer Res., 8, R12 (2006). Beesley, J et al. Association between single nucleotide polymorphisms in hormone metabolism and DNA repair genes and epithelial ovarian cancer: Results from two Australian studies and an additional validation set. Cancer Epidemiol. Bi…
Korean Hereditary Breast Cancer Study	KOHBRA	Korea	Population-based case-control study	Breast cancer patients at high risk were recruited from nationwide University Hospitals from May 2007 to May 2012. High-risk status mean 1) familial breast cancer, 2) early onset breast cancer (age <40), 3) breast and past/current ovarian cancer patients 4) cases with past/current double primary cancers, 5) bilateral breast cancer, 6) male breast cancer cases. All cases participated in the BCAC p…	No	Oversampling of familial cases						Han SA, Park SK, Ahn SH, Lee MH, Noh DY, Kim LS, Noh WC, Jung Y, Kim KS, Kim SW; Korean Breast Cancer Study Group. The Korean Hereditary Breast Cancer (KOHBRA) study: protocols and interim report. Clin Oncol (R Coll Radiol). 2011 Sep;23(7):434-41.
Los Angeles County Asian-American Breast Cancer Case-Control Study	LAABC	USA	Population-based	Incident cases recruited from 1995-2007 and identified from SEER cancer registries in Los Angeles County. Grouped by self-reported ethnicity.	Yes		825	26	-	79	Asian	Wu, A.H. et al. Dietary patterns and breast cancer risk in Asian American women. Am J Clin Nutr 2009;89:1–10. Wu, A.W., et al. Birth weigth and other prenatal factors and risk of breast cancer in Asian Americans. Breast Cancer Res & Treatment 2011;130(3):917-25.
Leuven Multidisciplinary Breast Centre	LMBC	Belgium	Hospital-based case-control study	All patients diagnosed with breast cancer and seen in the Multidisciplinary Breast Center in Leuven (Gashuisberg) since June 2007 plus retrospective collection of cases diagnosed since 2000.	Yes		2771	22	-	95	>90% of Flemish/Belgian origin for 3 genenrations; all Caucasian ethnicity	Neven P, Brouckaert O, Van Belle V, Vanden Bempt I, Hendrickx W, Cho H, Deraedt K, Van Calster B, Van Huffel S, Moerman P, Amant F, Leunen K, Smeets A, Wildiers H, Paridaens R, Vergote I, Christiaens MR. In early-stage breast cancer, the estrogen receptor interacts with correlation between human epidermal growth factor receptor 2 status and age at diagnosis, tumor grade, and lymph node involvemen…
Macedonian Breast Cancer Study	MABCS	Republic of North Macedonia	Hospital-based case-control study	Prospectively ascertained cases of breast cancer in two Hospitals in Skopje, Macedonia from 2012 to 2014. Ethnic origin: Macedonians (~82,8%) and Albanians (~17,2%). Age of the cases: 29 to 86, mean 53.8.	Yes		88	29	-	86	Macedonians (82,8%) and Albanians (17,2%)	No Ref.
Mammary Carcinoma Risk Factor Investigation	MARIE	Germany	Population-based case-control study	Incident cases diagnosed from 2001-2005 in the study region Hamburg in Northern Germany, and from 2002-2005 in the study region Rhein-Neckar-Karlsruhe in Southern Germany.	Yes		3470	49	-	75	European	Flesch-Janys, D et al.Risk of different histological types of postmenopausal breast cancer by type and regimen of menopausal hormone therapy Int J Cancer. 2008 Aug 15;123(4):933-41.
Cyprus Breast Cancer Case Control Study	MASTOS	Cyprus	Population-based case-control study	Women between 40-70 years of age who had a histologically confirmed diagnosis of primary breast cancer between January 1999 and December of 2005. The majority of cases were ascertained from the Bank of Cyprus Oncology Centre, which operates as a referral centre and offers treatment and follow-up for up to 90% of all breast cancer cases diagnosed in Cyprus. The rest of the patients, were recruited…	No	No samples left after applying exclusion criteria for individual subjects						Hadjisavvas et al. An investigation of breast cancer risk factors in Cyprus: a case control study. BMC Cancer 2010, 10:447
Milan Breast Cancer Study Group	MBCSG	Italy	Clinic-based recruitment of familial/early onset breast cancer patients (cases); population-based controls	Familial and/or early onset breast cancer patients (aged 22-87) negative for mutations in BRCA genes, ascertained in two large cancer centres in Milan from 2000 to date.	No	Oversampling of familial cases						De Vecchi et al. Evidences for association of the CASP8 –652 6N del promoter polymorphism with age at diagnosis in familial breast cancer cases (letter). Breast Cancer Res Treat 113:607-8, 2009. Catucci et al. Letter to the editor: SNPs in ultraconserved elements and familial breast cancer risk. Carcinogenesis 30:544–545, 2009.
Mayo Clinic Breast Cancer Study	MCBCS	USA	Hospital-based case-control study	Incident cases residing in 6 states (MN, WI, IA, IL, ND, SD) seen at the Mayo Clinic in Rochester, MN from 2002-5	Yes		2226	22	-	93	European	Olson, JE. et al. A comprehensive examination of CYP19 variation and breast density. Cancer Epidemiol. Biomarkers Prev. 16, 623-5 (2007)
Melbourne Collaborative Cohort Study	MCCS	Australia	Prospective cohort study: nested case-control study	Incident cases diagnosed between baseline (1990-1994) and last follow-up (2012) among the 24469 women participating in the cohort.	Yes		1442	31	-	88	European	Giles GG. et al. The Melbourne Collaborative Cohort Study. IARC Sci. Publ., 156, 69-70 (2002)
Multiethnic Cohort	MEC	USA	Prospective cohort study: nested case-control	Incident cases identified from SEER cancer registries in Los Angeles County & State registries in California & Hawaii, USA from 1993-2002. Grouped by self-reported ethnicity.	Yes		1568	46	-	90	European (55%), Afrianc-American (African AmEuropeanricans, 30%), OtherEuropean (15%)	Kolonel, L. N. et al. A multi-ethnic cohort in Hawaii and Los Angeles; Baseline characteristics. Am. J. Epidemiol., 151, 346-357 (2000)
Melanoma Inquiry of Southern Sweden	MISS	Sweden	Population-based prospective cohort study	Population based cohort off women aged 25-65 in southern Sweden, born in Sweden, no cancer diagnosis before, interviewed about cancer risk factors 1990,2000,2010, saliva sampled 2011, cancer incidence/mortality followed through registries.	Yes		697	28	-	85	Ethnical born Swedes	Olsson HL, Ingvar C, Bladstrom A. Hormone replacement therapy containing progestins and given continuously increases breast carcinoma risk in Sweden. Cancer. 2003 Mar;97(6):1387-92. Nielsen K, Måsbäck A, Olsson H, Ingvar C. A prospective study of 40000 women regarding host factors, UV exposure and sunbed use in relation to risk and anatomic site of malignant melanoma Int J Cancer. 2012;131(3)(Aug…
Mayo Mammography Health Study	MMHS	USA	Prospective Cohort Study (2003-2006) of women ages 35+ receiving screening mammography at Mayo Clinic and living in MN, IA, WI; nested case-control	Incident cases (Invasive or in situ) diagnosed at least 3 months after enrollment.	Yes		274	41	-	97	European	Olson JE, Sellers TA, Scott CG, Schueler BA, Brandt KR, Serie DJ, Jensen MR, Wu FF, Morton MJ, Heine JJ, Couch FJ, Pankratz VS, Vachon CM. The influence of mammogram acquisition on the mammographic density and breast cancer association in the Mayo Mammography Health Study cohort. Breast Cancer Res. 2012 Nov 15;14(6):R147.
Memorial Sloan-Kettering Cancer Center Study	MSKCC*	USA	Case-control study	Incident and prevalent cases of histologically-confirmed breast cancer referred to the Clinical Genetics Service at MSKCC since July 1996. All cases tested negative for BRCA1/2 mutations.	No	Oversampling of familial cases						Comen E, Balistreri L, Gönen M, Dutra-Clarke A, Fazio M, Vijai J, Stadler Z, Kauff N, Kirchhoff T, Hudis C, Offit K, Robson M. Discriminatory accuracy and potential clinical utility of genomic profiling for breast cancer risk in BRCA-negative women. Breast Cancer Res Treat 2010; [Epub].
Montreal Gene-Environment Breast Cancer Study	MTLGEBCS	Canada	Population-based case-control study	All cases are postmenopausal women (47-75 years) living in Montreal with a primary invasive breast cancer and with no previous occurrence of any type of cancer. All cases were identified from 2007 to 2010 in 15 of 16 Montreal hospitals that treat breast cancer.	No	No survival information
Malaysian Breast Cancer Genetic Study	MYBRCA	Malaysia	Hospital-based case-control study	Breast cancer cases identified at the Breast Cancer Clinic in University Malaya Medical Centre Jan 2003-July 2014 and Subang Jaya Medical Centre Sep 2012-Sept 2014; cases are a mixture of prevalent and incident cases.	Yes		1339	22	-	86	Asian	Tan M-M, Ho W-K, Yoon S-Y, Mariapun S, Hasan SN, Lee DS-C, et al. (2018) A case-control study of breast cancer risk factors in 7,663 women in Malaysia. PLoS ONE 13(9): e0203469. https://doi.org/10.1371/journal.pone.0203469
Norwegian Breast Cancer Study	NBCS	Norway	Hospital-based case-control study	Incidence cases from three different hospitals: 1) Cases (114) mean age 64 (28-92) at Ullevål Univ. Hospital 1990-94, 2) cases (182) mean age 59 (26-75) referred to Norwegian Radium Hospital 1975-1986, 3) cases (124), mean age 56 (29-82) with stage I or II disease, in the Oslo micro-metastases study at Norwegian Radium Hospital between 1995-1998, 4) Breast cancer cases referred to the Norwegian h…	Yes		1967	24	-	97	European	Aure et al. Genome Med. 2015 Feb 2;7(1):21. Fleischer et al. 2014 Genome Biol. 2014;15(8):435. Fleischer et al. 2014 Int J Cancer. 2014 Jun 1;134(11):2615-25. Quigley et al. 2014 Mol Oncol. 2014 Mar;8(2):273-84.
Nashville Breast Health Study	NBHS*	USA	Population-based case-control study	Through a rapid case-ascertainment system, we identified newly-diagnosed breast cancer cases through the Tennessee State Cancer Registry and five major hospitals in the city that provide medical care for breast cancer patients. Eligible cases were women diagnosed with invasive breast cancer or ductal carcinoma in situ, who were between the ages of 25 and 75, had no prior history of cancer other t…	No	No samples left after applying exclusion criteria for individual subjects						Zheng W, Long J, Gao YT, Li C, Zheng Y, Xiang YB, Wen W, Levy S, Deming SL, Haines JL, Gu K, Fair AM, Cai Q, Lu W, Shu XO. Genome-wide association study identifies a new breast cancer susceptibility locus at 6q25.1. Nature Genetics 41(3):324-8, 2009. PMCI.
Northern California Breast Cancer Family Registry	NC-BCFR	USA	Population-based recruitment of families; family-based cohort; population-based controls for subset of cases	Incident breast cancer cases included women aged <65 years diagnosed from 1995-2009, identified through the SEER cancer registry of the Greater San Francisco Bay Area. All cases with indicators of increased genetic risk were eligible to enroll (dx at age <35 yrs, personal history of ovarian or childhood cancer, bilateral breast cancer with 1st dx at age <50, family history of breast or ovarian ca…	No	Oversampling of familial cases						John,E.M. et al. The Breast Cancer Family Registry: an infrastructure for cooperative multinational, interdisciplinary and translational studies of the genetic epidemiology of breast cancer. Breast Cancer Res 6, R375-R389 (2004). Terry M, Phillips K, Daly M, et al. Cohort Profile: The Breast Cancer Prospective Family Study Cohort (ProF-SC). International Journal of Epidemiology 2015;:dyv118.
North Carolina Breast Cancer Study	NCBCS	USA	NCBCS Phases 1 & 2: population-based case-control study. NCBCS Phase 3: population-based case-only study. In each phase, African American women and women under the age of 50 with invasive breast cancer were over-sampled. There was no over sampling by race or age for CIS cases in Phase 2.	NCBCS Phase 1: women aged of 20-74 residing in the 24 North Carolina county area and diagnosed with a first primary invasive breast cancer from 1993-1996. NCBCS Phase 2: women aged of 20-74 residing in the same study area and diagnosed with a first primary invasive breast cancer from 1996-2000. All women diagnosed with DCIS, DCIS with microinvasion to a depth of 2mm, LCIS, and mixed of DCIS & LCI…	Yes		1756	23	-	74	European, African, Other.	Newman, B., Moorman, P. G., Millikan, R., Qaqish, B. F., Geradts, J., Aldrich, T. E., and Liu, E. T. The Carolina Breast Cancer Study: integrating population-based epidemiology and molecular biology. Breast Cancer Res Treat, 35: 51-60, 1995. Millikan, R., Eaton, A., Worley, K., Biscocho, L., Hodgson, E., Huang, W. Y., Geradts, J., Iacocca, M., Cowan, D., Conway, K., and Dressler, L. HER2 codon 65…
Nagano Breast Cancer Study	NGOBCS	Japan	Hospital-based case-control study	A consecutive series of female patients with newly diagnosed and histologically confirmed invasive breast cancer in four hospitals.	No	No samples left after applying exclusion criteria for individual subjects						Shimada N, Iwasaki M, Kasuga Y, Yokoyama S, Onuma H, Nishimura H, et al. Genetic polymorphisms in estrogen metabolism and breast cancer risk in case-control studies in Japanese, Japanese Brazilians and non-Japanese Brazilians. J Hum Genet. 2009;54:209-15.
Nurses' Health Study	NHS	USA	Prospective cohort study: nested case-control	Incident cases arising in the sub-cohort of 32,826 cohort members who gave a blood specimen in 1989-1990 are included if they were diagnosed with breast cancer prior to July 1, 2000.	Yes		1898	34	-	89	Majority European	Hankinson SE. et al. Plasma sex steroid hormone levels and risk of breast cancer in post-menopausal women. J. Natl. Cancer Inst., 96,1866-9 (2004). http://www.channing.harvard.edu/nhs/
Nurses' Health Study 2	NHS2	USA	Prospective cohort study: nested case-control	Incident cases arising in the sub-cohort of 29,611 women that donated blood during 1996 to 1999 are included.	Yes		1295	26	-	63	Majority European-ancestry	Tworoger SS, Missmer SA, Eliassen AH, Spiegelman D, Folkerd E, Dowsett M, Barbieri RL, Hankinson SE. The association of plasma DHEA and DHEA sulfate with breast cancer risk in predominantly premenopausal women. Cancer Epidemiol Biomarkers Prev 2006;15(5):967–971. doi:10.1158/1055-9965.EPI-05-0976.
Oulu Breast Cancer Study	OBCS	Finland	Hospital-based case-control study	Consecutive incident cases diagnosed at the Oulu University Hospital between 2000 and 2004.	Yes		509	28	-	90	European	Erkko,H. et al. A recurrent mutation in PALB2 in Finnish cancer families. Nature 446, 316-319 (2007).
Ontario Familial Breast Cancer Registry	OFBCR	Canada	Population-based familial case-control study	Cases diagnosed between 1 Jan 1996-31 Dec 1998 were identified from the Ontario Cancer Registry which registers >97% of all cases residing in the province at the time of diagnosis. All women with invasive breast cancer aged 20–54 years who met the OFBCR definition for high genetic risk (family history of specific cancers particularly breast and ovarian, early onset disease, Ashkenazi ethnicity or…	No	Oversampling of familial cases						John,E.M. et al. The Breast Cancer Family Registry: an infrastructure for cooperative multinational, interdisciplinary and translational studies of the genetic epidemiology of breast cancer. Breast Cancer Res 6, R375-R389 (2004).
Leiden University Medical Centre Breast Cancer Study	ORIGO	Netherlands	Hospital-based prospective cohort study	Consecutive cases diagnosed 1996-2006 in 2 hospitals of South-West Netherlands (Leiden & Rotterdam). No selection for family history; Rotterdam cases selected for diagnosis aged <70. Cases with in situ carcinomas eligible.	Yes		1238	22	-	87	European	de Bock,G.H. et al. Tumour characteristics and prognosis of breast cancer patients carrying the germline CHEK2*1100delC variant. Journal of Medical Genetics 41, 731-735 (2004). Huijts PE et al . Clinical correlates of low-risk variants in FGFR2, TNRC9, MAP3K1, LSP1 and 8q24 in a Dutch cohort of incident breast cancer cases. Breast Cancer Res.9, R78 (2007).
NCI Polish Breast Cancer Study	PBCS	Poland	Population-based case-control study	Incident cases from 2000-2003 identified through a rapid identification system in participating hospitals covering ~ 90% of all eligible cases, and cancer registries in Warsaw and Łódź covering 100% of all eligible cases.	Yes		1937	27	-	75	European	Garcia-Closas, M. et al. Polymorphisms in DNA double-strand break repair genes and risk of breast cancer: two population-based studies in USA and Poland, and meta-analyses. Hum. Genet, 119, 376-88 (2006).
Karolinska Mammography Project for Risk Prediction of Breast Cancer - Case-Control Study	pKARMA	Sweden	Case-control study	Incident cases from Jan 2001 – Dec 2008 from the Stockholm/Gotland area. Identified through the Stockholm breast cancer registry.	Yes		5507	23	-	86	European	Unpublished
The Prostate,Lung,Colorectal and Ovarian (PLCO) Cancer Screening Trial	PLCO	USA	Prospective cohort study: nested case-control	Incident cases arising in the sub-cohort of 78,232 women who gave a blood specimen in 1993-2001 are included if they were diagnosed with breast cancer. Recruitment via mutiple screening centers across the US.	Yes		2360	55	-	86	European	Pfeiffer, R.M., et al. Risk Prediction for Breast, Endometrial, and Ovarian Cancer in White Women Aged 50 y or Older: Derivation and Validation from Population-Based Cohort Studies. Plos Med, 10(7), 2013.
Prospective Study of Outcomes in Sporadic Versus Hereditary Breast Cancer	POSH	UK	Prospective cohort	Cases aged 40 or younger at breast cancer diagnosis. Recruited from breast cancer centre oncology clinics across 126 UK hospitals and diagnosed between January 2000 to December 2007.	Yes		1640	18	-	41	Mostly E, 3% ethnic minority groups e.g. Black, Asian	Eccles et al (2007) Prospective study of Outcomes in Sporadic versus Hereditary breast cancer (POSH): Study Protocol. BMC. Cancer 7, 160. Tapper W, et al (2008). Association between common genetic variants and prognosis of early onset breast cancer in 30 candidate genes. Breast Cancer Research; 10:R108. Copson E et al (2013) Prospective observational study of breast cancer treatment outcomes for …
Evaluation of Predictive Factors regarding the Effectivity of Aromatase Inhibitor Therapy	PREFACE	Germany	Multicenter, prospective, randomized, open-label phase IV study	Postmenopausal, steroid hormone receptor positive breast cancer patients who are treated with letrozole. Recruitment at multicentres in Germany between 2009-2011.	Yes		2794	41	-	95	European	No references yet
Predicting the Risk Of Cancer At Screening Study	PROCAS	UK	Population based study	Women diagnosed with breast cancer since joining the study of women attending the Breast Screening Programme (NHSBSP) in Greater Manchester. Recruitment period Oct 2009-May 2014.	Yes		403	46	-	76	European	Evans DG, Astley S, Stavrinos P, Harkness E, Donnelly LS, Dawe S, et al.Improvement in risk prediction, early detection and prevention of breast cancer in the NHS Breast Screening Programme and family history clinics: a dual cohort study. Programme Grants Appl Res 2016;4(11).
Rotterdam Breast Cancer Study	RBCS	Netherlands	Hospital-based case-control study, Rotterdam area	Familial breast cancer patients selected from the Clinical Genetics Center at Erasmus MC Cancer Institute; recruited 1994 - 2005 (RBCS1) and 1995 - 2009 (RBCS2; for OncoArray).	No	Oversampling of familial cases						M Kriege, A Hollestelle, A Jager et al. Survival and contralateral breast cancer in CHEK2*1100delC breast cancer patients: impact of adjuvant chemotherapy. Br J Cancer 2014; 111(5):1004-13.
Singapore and Sweden Breast Cancer Study	SASBAC	Sweden	Population-based case-control study	Incident cases from October 1993 to March 1995 identified via the 6 regional cancer registries in Sweden, to which reporting is mandatory.	Yes		1221	50	-	75	European	Wedren, S. et al. Oestrogen receptor alpha gene haplotype and postmenopausal breast cancer risk: a case control study. Breast Cancer Res., 6, R437-49 (2004).
Shanghai Breast Cancer Genetic Study	SBCGS	China	Population-based case-control study, cohort study	Newly-diagnosed breast cancer cases recruited from 1996 -2009. Cases were identified mostly from the Shanghai Cancer Registry. Some cases were identified from the Shanghai Women’s Health Study.	Yes		1670	25	-	80	Chinese	Zheng W, Long J, Gao YT, Li C, Zheng Y, Xiang YB, Wen W, Levy S, Deming SL, Haines JL, Gu K, Fair AM, Cai Q, Lu W, Shu XO. Genome-wide association study identifies a new breast cancer susceptibility locus at 6q25.1. Nature Genetics 41(3):324-8, 2009. PMCI.
Sheffield Breast Cancer Study	SBCS	UK	Hospital-based case-control study	Women with pathologically confirmed breast cancer recruited from surgical outpatient clinics at the Royal Hallamshire Hospital, Sheffield, 1998 – 2005; cases are a mixture of prevalent and incident disease	Yes		1023	28	-	92	European	MacPherson,G. et al. Association of a common variant of the CASP8 gene with reduced risk of breast cancer. Journal of the National Cancer Institute 96, 1866-1869 (2004). Rafii,S. et al. A potential role for the XRCC2 R188H polymorphic site in DNA-damage repair and breast cancer. Human Molecular Genetics 11, 1433-1438 (2002).
Southern Community Cohort Study	SCCS	USA	Prospective cohort study: nested case-control	Incident cases (N=222) from 2002-2009 identified from 12 state cancer registries in southeastern US.	No	No samples left after applying exclusion criteria for individual subjects						Signorello LB, Hargreaves MK, Blot WJ. The Southern Community Cohort Study: investigating health disparities. J Health Care Poor Underserved, 21, 26-37 (2010).
Study of Epidemiology and Risk factors in Cancer Heredity	SEARCH	UK	Population-based case-control study	2 groups of cases identified through East Anglian Cancer Registry; 1) prevalent cases diagnosed 1991-1996 under 55 years of age at diagnosis, recruited 1996-2002; 2) incident cases diagnosed since 1996 under 70 years of age at diagnosis, recruited 1996-present.	Yes		15166	21	-	88	European	Lesueur, F. et al. Allelic association of the human homologue of the mouse modifier Ptprj with breast cancer. Hum. Mol. Genet., 14, 2349-56 (2005).
Seoul Breast Cancer Study	SEBCS	Korea	Hospital-based case-control study	Consecutive, incident, cases from 2 hospitals in Seoul recruited 2001-2005.	Yes		3511	19	-	82	Asian	Lee, K.M. et al. Genetic polymorphisms of ataxia telangiectasia mutated and breast cancer risk. Cancer Epidemiol. Biomarkers Prev., 14, 821-5 (2005). Han,S. et al. CASP8 polymorphisms, estrogen and progesterone receptor status, and breast cancer risk. Breast Cancer Res Treat. 110, 387-393 (2008).
Singapore Breast Cancer Cohort	SGBCC	Singapore	Hospital-based breast cancer cohort and population-based controls	Living breast cancer patients diagnosed with primary insitu or invasive breast cancer at National University Hospital between 2006-2013. Cases are a mixture of prevalent and incident cases.	Yes		2999	24	-	91	Asian (Chinese, Malay and Indian)	No refs.
The Sister Study	SISTER	USA	Case-cohort nested in US and Puerto Rican prospective cohort of breast-cancer free women with a sister-history of breast cancer	Participants with an incident breast cancer (lobular or ductal in situ or any invasive breast cancer) diagnosis after enrolment. SISTER participants are US/Puerto Rican women (35-74 years) never diagnosed with breast cancer themselves but with a sister diagnosed with breast cancer prior to study start. Recruitment from 2003 to 2009.	No	Oversampling of familial cases						Nichols, H. B., et al. "Tubal ligation in relation to menopausal symptoms and breast cancer risk." Br.J.Cancer 109.5 (2013): 1291-95. Xu Z, Bolick SC, DeRoo LA, Weinberg CR, Sandler DP, Taylor JA. Epigenome-wide association study of breast cancer using prospectively collected Sister Study samples.J Natl Cancer Inst. 2013 May 15; 105(10):694-700. Epub 2013 Apr 11. Sister Study website: http://sist…
Städtisches Klinikum Karlsruhe Deutsches Krebsforschungszentrum Study	SKKDKFZS	Germany	Hospital-based breast cancer cohort	Women diagnosed with primary in situ or invasive breast cancer at the Städtisches Klinikum Karlsruhe from March 1993 to July 2005.	Yes		1552	21	-	93	>99% Caucasian	Stevens, K.N. et al. 9p13.1 is a triple-negative-specific breast cancer susceptibility locus. Cancer Res. 2012;72(7):1795-803.
Swedish Mammography Cohort	SMC	Sweden	Nested case control study from a population-based prospective cohort	All breast cancer cases in the cohort (information from the Swedish Cancer Register) from 1987-2011 for women who gave saliva in 2005-2008 or a blood specimen in 2003-2009 are included.	Yes		1536	41	-	91	Caucasian	Suzuki R1, Ye W, Rylander-Rudqvist T, Saji S, Colditz GA, Wolk A. Alcohol and postmenopausal breast cancer risk defined by estrogen and progesterone receptor status: a prospective cohort study. J Natl Cancer Inst. 2005 Nov 2;97(21):1601-8.
Simultaneous Study of Gemcitabine-Docetaxel Combination adjuvant treatment	SUCCESSB	Germany	Multicenter, prospective, randomized, open-label phase III study	Patients with primary Her2-positive and high risk breast cancer (pN+ oder >pT1b or >G1 or <36y or HR-). Recruitment at multicentres in Germany during 2008-2011.	Yes		450	28	-	81	European	Andemassen U, Neugebauer J, Janni W, Hepp P, Ortmann U, Sommer H, Rack B, Grp SS. (2011) Simultaneous study of gemcitabine-docetaxel combination adjuvant treatment, as well as biological targeted treatment: the SUCCESS B Trial. Breast 20:S66-S66. Jaeger BAS, et al. (2012) HER2 expression on circulating tumor cells (CTC) in patients with early HER2-positive breast cancer: Results of the German SUC…
Simultaneous Study of Docetaxel Based Anthracycline Free Adjuvant Treatment Evaluation	SUCCESSC	Germany	Multicenter, prospective, randomized, open-label phase III study	Patients with primary Her2-negative and high risk breast cancer (pN+ oder >pT1b or >G1 or <36y or HR-). Recruitment at multicentres in Germany during 2009-2011.	Yes		3086	24	-	79	European	Hepp P, et al. (2009) Simultaneous Study of Docetaxel Based Anthracycline Free Adjuvant Treatment Evaluation, as Well as Lifestyle Intervention Strategies Success C-Studie. Anticancer Res 29 (5):1567-1568. Jaeger BA, et al. (2015) Persistence of circulating tumor cells immediately after and two years after systemic adjuvant chemotherapy in patients with early breast cancer - Results of the German…
Szczecin Breast Cancer Study	SZBCS	Poland	Hospital-based case-control study	Prospectively ascertained cases of invasive breast cancer patients diagnosed at the Regional Oncology Hospital (Szczecin) in the years 2002, 2003, 2006 and 2007 or the University Hospital from 2002 to 2007 in Szczecin, West-Pomerania, Poland. Patients with pure intraductal or intralobular cancer were excluded (DCIS or LCIS) but patients with DCIS with micro-invasion were included.	Yes		1128	25	-	88	European	Jakubowska A, Cybulski C, Szymańska A, Huzarski T, Byrski T, Gronwald J, Debniak T, Górski B, Kowalska E, Narod SA, Lubiński J. BARD1 and breast cancer in Poland. Breast Cancer Res Treat. 2008 Jan;107(1):119-22. Jakubowska A, Jaworska K, Cybulski C, Janicka A, Szymańska-Pasternak J, Lener M, Narod SA, Lubiński J; IHCC-Breast Cancer Study Group. Do BRCA1 modifiers also affect the risk of breast ca…
Triple Negative Breast Cancer Consortium Study	TNBCC	Various			No	No samples left after applying exclusion criteria for individual subjects
Taiwanese Breast Cancer Study	TWBCS	Taiwan	Hospital-based case-control study	Incident cases diagnosed & treated at 2 major teaching hospitals in Taiwan. [between March 2002 and August 2005]	Yes		1783	20	-	90	Asian	Hsu, HM et al. Breast cancer risk is associated with genes encoding the DNA double-strand break repair Mre11/Rad50/Nbs1 complex. Cancer Epidemiol. Biomarkers Prev. 16, 2024-32 (2007). Ding, Sl, et al. Genetic variants of BLM interact with RAD51 to increase breast cancer susceptibility. Carcinogenesis. 30, 43-9 (2009).
Utah Breast Cancer Study	UBCS	USA	Mixed. (1) Pedigrees including multiple sampled breast cancer cases within 2 generations, also may include sampled, unaffected relatives; (2) hospital-based cases (from Huntmans Cancer Institute [HCI] or Intermountain Healthcare [IH]), and breast reduction controls; and (3) Population-based cases (from the Utah Cancer Registry [UCR]) and controls (from the Utah Drivers License Registry [UDLR])	Cases recruited from late 1970s to present (on-going). Ascertainment from: (1) UCR-confirmed breast cancer cases in high-risk pedigrees; (2) invasive breast cancer cases treated or surgery performed at HCI or IH clinics; (3) prevalent, population-based UCR-confirmed breast cancer cases.	Yes		1975	25	-	93	94.4% European ancestry; 3.6% hispanic American; 0.4% African ancestry; 1.3% other/mixed ancestry; 0.3% unknown.	No references.
UCI Breast Cancer Study	UCIBCS	USA	Population-based case-control study	All cases diagnosed in Orange County, California, during one-year period beginning March 1, 1994. Ascertained through the population-based Cancer Surveillance Program of Orange County California (CSPOC).	Yes		913	24	-	90	European,Asian,Hispanic	Anton-Culver, H.et al. Characteristics of BRCA1 mutations in a population-based case series of breast and ovarian cancer. Eur. J. Cancer, 36, 1200-8 (2000). Ziogas, A. et al. Cancer risk estimates for family members of a population-based family registry for breast and ovarian cancer. Cancer Epidemiol. Biomarkers Prev., 9, 103-11 (2000)
US Three State Study	US3SS	USA	Population-based case-control study	Eligible cases were all English-speaking female residents of Massachusetts (excluding metropolitan Boston), New Hampshire and Wisconsin, with a new diagnosis of invasive (aged 20–69 years) or in situ breast cancer (aged 20–74 years, MA and NH only) reported to each state's mandatory cancer registry during 1998-2001.	Yes		1733	28	-	72	Predominantly European	García-Closas M, Egan KM, Newcomb PA, Brinton LA, Titus-Ernstoff L, Chanock S, Welch R, Lissowska J, Peplonska B, Szeszenia-Dabrowska N, Zatonski W, Bardin-Mikolajczak A, Struewing JP. Polymorphisms in DNA double-strand break repair genes and risk of breast cancer: two population-based studies in USA and Poland, and meta-analyses. Hum Genet. 2006 May;119(4):376-88. Epub 2006 Feb 17.
US Radiologic Technologists Study	USRT	USA	Population -based case-control study using prevalent cases with controls matched to cases on year of birth	Prevalent cases identified through mailed surveys in 1983-8 and 1994-8, incident cases between surveys; blood collected from 1999-2004; unselected for family cancer history or any other characteristics; most cases sampled more than 5 years after diagnosis.	Yes		1380	24	-	87	Mostly caucasian	Doody MM, Freedman DM, Alexander BH, Hauptmann M, Miller JS, Rao RS, Mabuchi K, Ron E, Sigurdson AJ, Linet MS. Breast cancer incidence in U.S. radiologic technologists. Cancer. 2006 Jun 15;106(12):2707-15. Bhatti P, et al. Breast cancer risk polymorphisms and interaction with ionizing radiation among U.S. radiologic technologists. Cancer Epidemiol Biomarkers Prev 2008;17:2007-11. Rajaraman P, et …
Women of African Ancestry Breast Cancer Study	WAABCS	Nigeria, Cameroon, Uganda	Hospital-based case-control study	Consecutive cases aged 18 or older with invasive breast cancer recruited at the University College Hospital in Ibadan, Nigeria, the Mulago Hospital in Kampala, Uganda, and the Yaounde General Hospital in Yaounde, Cameroon after 1998.	No	No samples left after applying exclusion criteria for individual subjects						Huo D, Adebamowo CA, Ogundiran TO, Akang EE, Campbell O, Adenipekun A, Cummings S, Fackenthal J, Ademuyiwa F, Ahsan H, Olopade OI. Parity and breastfeeding are protective against breast cancer in Nigerian women. Br J Cancer. 2008 Mar 11;98(5):992-6. Qian F, Ogundiran T, Hou N, Ndom P, Gakwaya A, Jombwe J, Morhason-Bello I, Adebamowo C, Ademola A, Ojengbede O, Olopade OI, Huo D. Alcohol consumptio…
							121435
* Only for included studies
*,# Only patients included in the analysis after applying exclusion criteria for individual subjects
							242870
* Only for included studies
*,# Only patients included in the analysis after applying exclusion criteria for individual subjects
